# Supplementary material for: Anisotropic P-wave travel-time tomography implementing Thomsen's weak approximation in TOMO3D
Source: Copernicus journal article supplement (doi:10.5194/se-10-1857-2019), 2019-11-04
Supplement: Supplementary file 1 [file se-10-1857-2019-supplement.pdf]

Supplement of Solid Earth, 10, 1857–1876, 2019  
<https://doi.org/10.5194/se-10-1857-2019-supplement>  
© Author(s) 2019. This work is distributed under  
the Creative Commons Attribution 4.0 License.

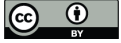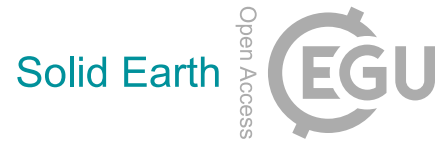

*Supplement of*

## **Anisotropic P-wave travel-time tomography implementing Thomsen's weak approximation in TOMO3D**

**Adrià Meléndez et al.**

*Correspondence to:* Adrià Meléndez (melendez@icm.csic.es)

The copyright of individual parts of the supplement might differ from the CC BY 4.0 License.

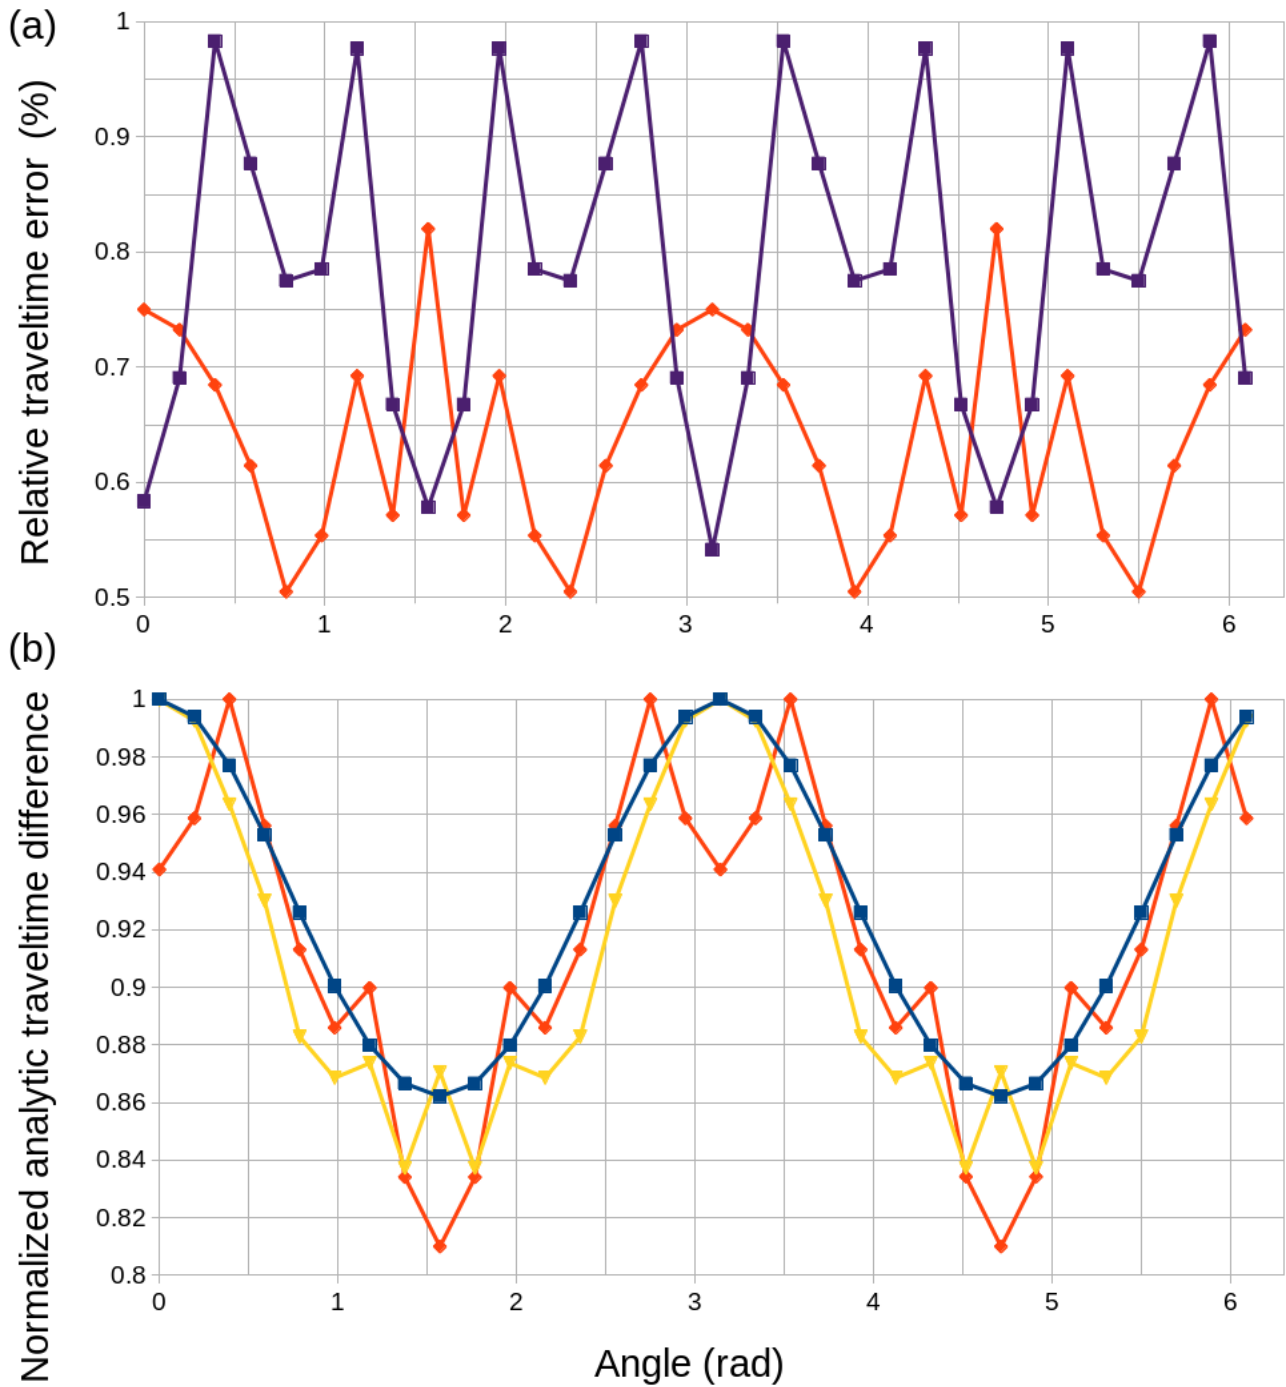

Figure S1: Improvement of (a) accuracy and (b) sensitivity pattern of  $v$  in  $P[\varepsilon]$  for the 0 rad meridian with refinement of the model grid by a factor of 2. In (a) the purple line marks the accuracy for the grid used in the synthetic tests in this paper as a reference for comparison with the orange line indicating the accuracy achieved using a refined grid. The refined average relative traveltme error is  $0.64\% \pm 0.08\%$  compared to the  $0.8\% \pm 0.1\%$ . In (b) the comparison is established among the blue line marking the analytic sensitivity as a reference, and the sensitivities for the grid that we used (orange line) and the refined grid (yellow line). The refined grid reduces the relative traveltme error and produces a better fit of the analytic sensitivity.

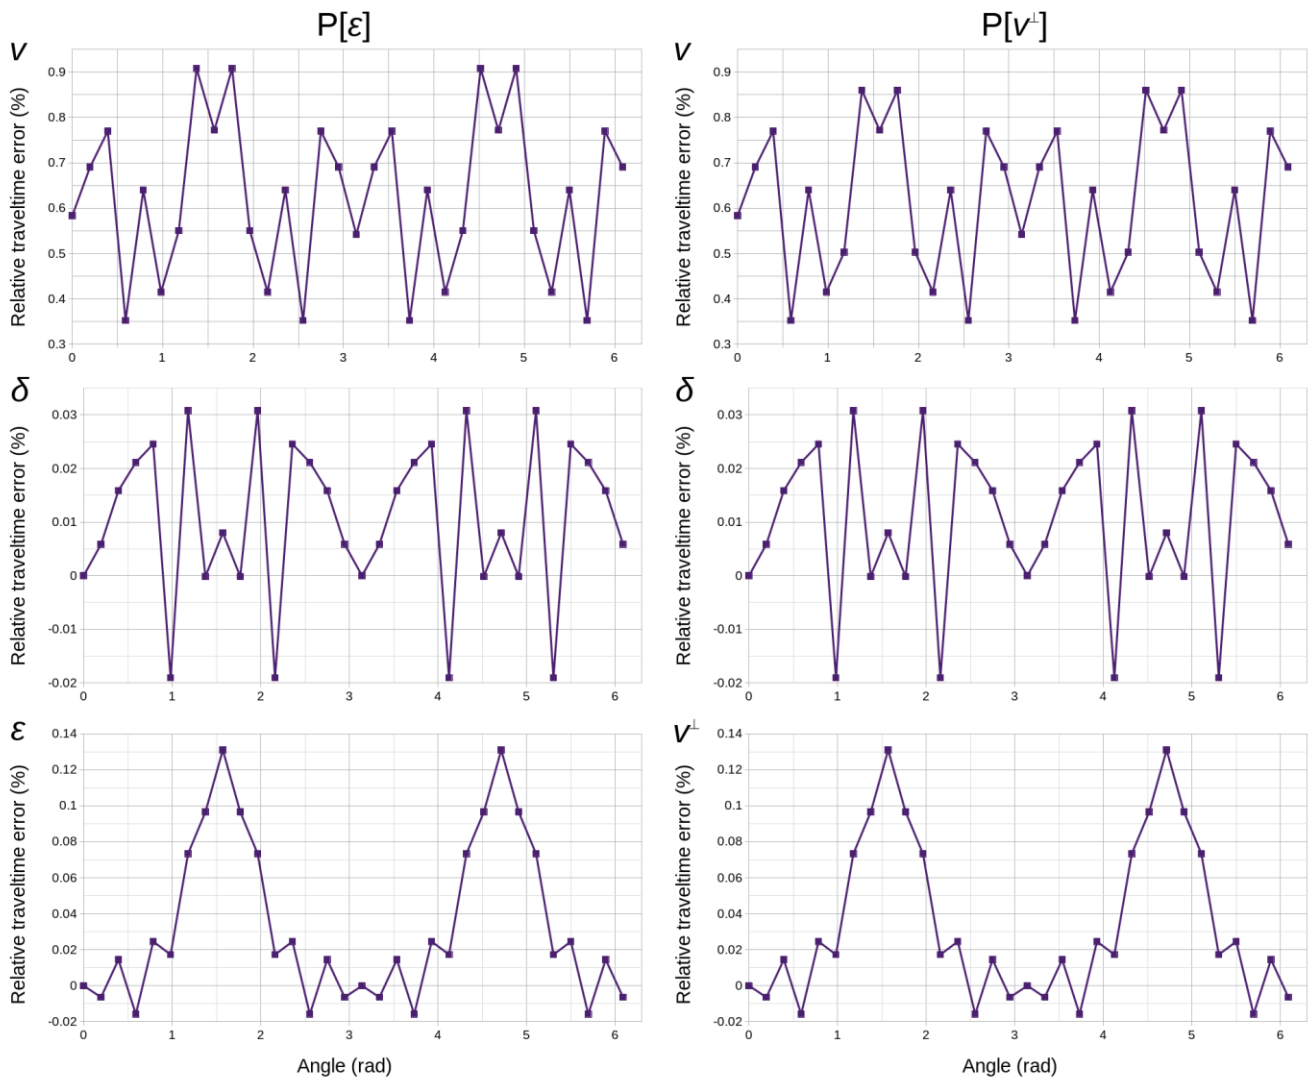

**Figure S2: For the  $\pi/4$  rad meridian, relative traveltime errors in percentage with respect to the analytic value for three pairs of equivalent simulations used in the sensitivity tests. Polar angle origin is in the downward vertical axis. Both parametrizations produce almost identical accuracies.**

### *Mathematical proof for the shapes of $v$ sensitivity in both parametrizations*

Regarding the shapes of relative and normalized sensitivities for  $v$ , in the following we provide mathematical proof showing that the former is constant whereas the latter is sinusoidal.

We use  $\Delta t$  to refer to the difference between the travel times measured with and without the 25% anomaly.  $x_A$  is the thickness of the anomaly whereas  $x_B$  is the total ray path length from source to receiver.  $v_A$  and  $v_B$  are the anisotropic velocities in the anomaly and in the background respectively.

$$\Delta t = \Delta \left( \frac{x}{v} \right) = \frac{x_B}{v_B} - \left( \frac{x_A}{v_A} + \frac{x_B - x_A}{v_B} \right) = \frac{x_A(v_A - v_B)}{v_A v_B}$$

According to the definition we have just given, the sensitivity expressed as relative difference is

$$S_R = \frac{\frac{x_A(v_A - v_B)}{v_A v_B}}{t_R}$$

where  $t_R$  is the travel time measured without the anomaly

$$t_R = x_B/v_B$$

With that  $S_R$  becomes

$$S_R = \frac{x_A}{x_B} \left( 1 - \frac{v_B}{v_A} \right)$$

In the case of a 25% anomaly in the  $v$  parameter in P[ $\varepsilon$ ],  $v_A$  and  $v_B$  are as follows

$$v_A = v_{PA}(1 + \delta \sin^2 \theta \cos^2 \theta + \varepsilon \sin^4 \theta)$$

$$v_B = v_{PB}(1 + \delta \sin^2 \theta \cos^2 \theta + \varepsilon \sin^4 \theta)$$

We use  $v_{PA}$  and  $v_{PB}$  to refer to the axis-parallel velocity parameter  $v$ . For a 25% anomaly in  $v$  their proportion is  $v_{PA} = 1.25 v_{PB}$ . The values for  $x_A$  and  $x_B$  are  $x_A = 1 \text{ km}$  and  $x_B = 1.25 \text{ km}$ . Thus, the final expression for  $S_R$  for a 25% anomaly in  $v$  in P[ $\varepsilon$ ] is a constant 0.05 (or 5%).

$$S_R = \frac{1}{1.25} \left( 1 - \frac{1}{1.25} \right) = 0.05$$

Regarding the sensitivity expressed as normalized difference, the general expression for an anomaly in any of the four parameters is

$$S_N = \frac{\frac{x_A(v_A - v_B)}{v_A v_B}}{\Delta t_{MAX}} = \frac{x_A}{\Delta t_{MAX}} \left( \frac{1}{v_B} - \frac{1}{v_A} \right)$$

where  $\Delta t_{MAX}$  is the maximum travel time difference among all four parameters. This expression will contain some combination of sinusoidal functions for all four possible anomalies. The sensitivity (normalized and relative) pattern for  $v$  in  $P[v^\perp]$  is different than for  $P[\varepsilon]$  although it follows the same sinusoidal pattern and it has equal maxima. We can see that in the case of  $P[v^\perp]$  both  $S_R$  and  $S_N$  will display a sinusoidal shape. Now  $v_A$  and  $v_B$  are

$$v_A = v_{PA} \left( 1 + \delta \sin^2 \theta \cos^2 \theta + \left( \frac{v^\perp}{v_{PA}} - 1 \right) \sin^4 \theta \right)$$

$$v_B = v_{PB} \left( 1 + \delta \sin^2 \theta \cos^2 \theta + \left( \frac{v^\perp}{v_{PB}} - 1 \right) \sin^4 \theta \right)$$

and the sine and cosine functions do not cancel out in  $S_R$ , as they did in the case of an anomaly in  $v$  in  $P[\varepsilon]$ , nor in  $S_N$ . For the latter it is trivial to see that the sinusoidal dependencies are identical to the case in  $P[\varepsilon]$ .
